# Supplementary figures and images for: DC field-biased multibit/analog artificial synapse featuring an additional degree of freedom for performance tuning
Source: Royal Society of Chemistry journal article supplement (doi:10.1039/d4nr03464c), 2024-12-09

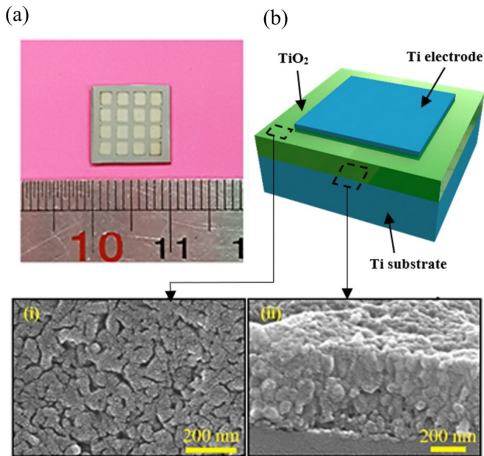

Supplement: d4nr03464c3.pdf [file d4nr03464c3.pdf]

(a)

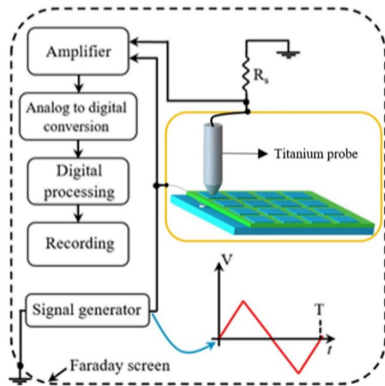

(b)

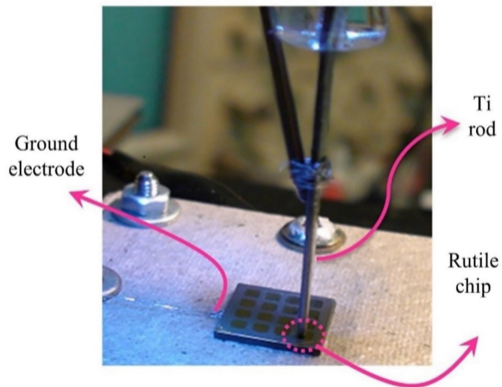

Supplement: d4nr03464c4.pdf [file d4nr03464c4.pdf]

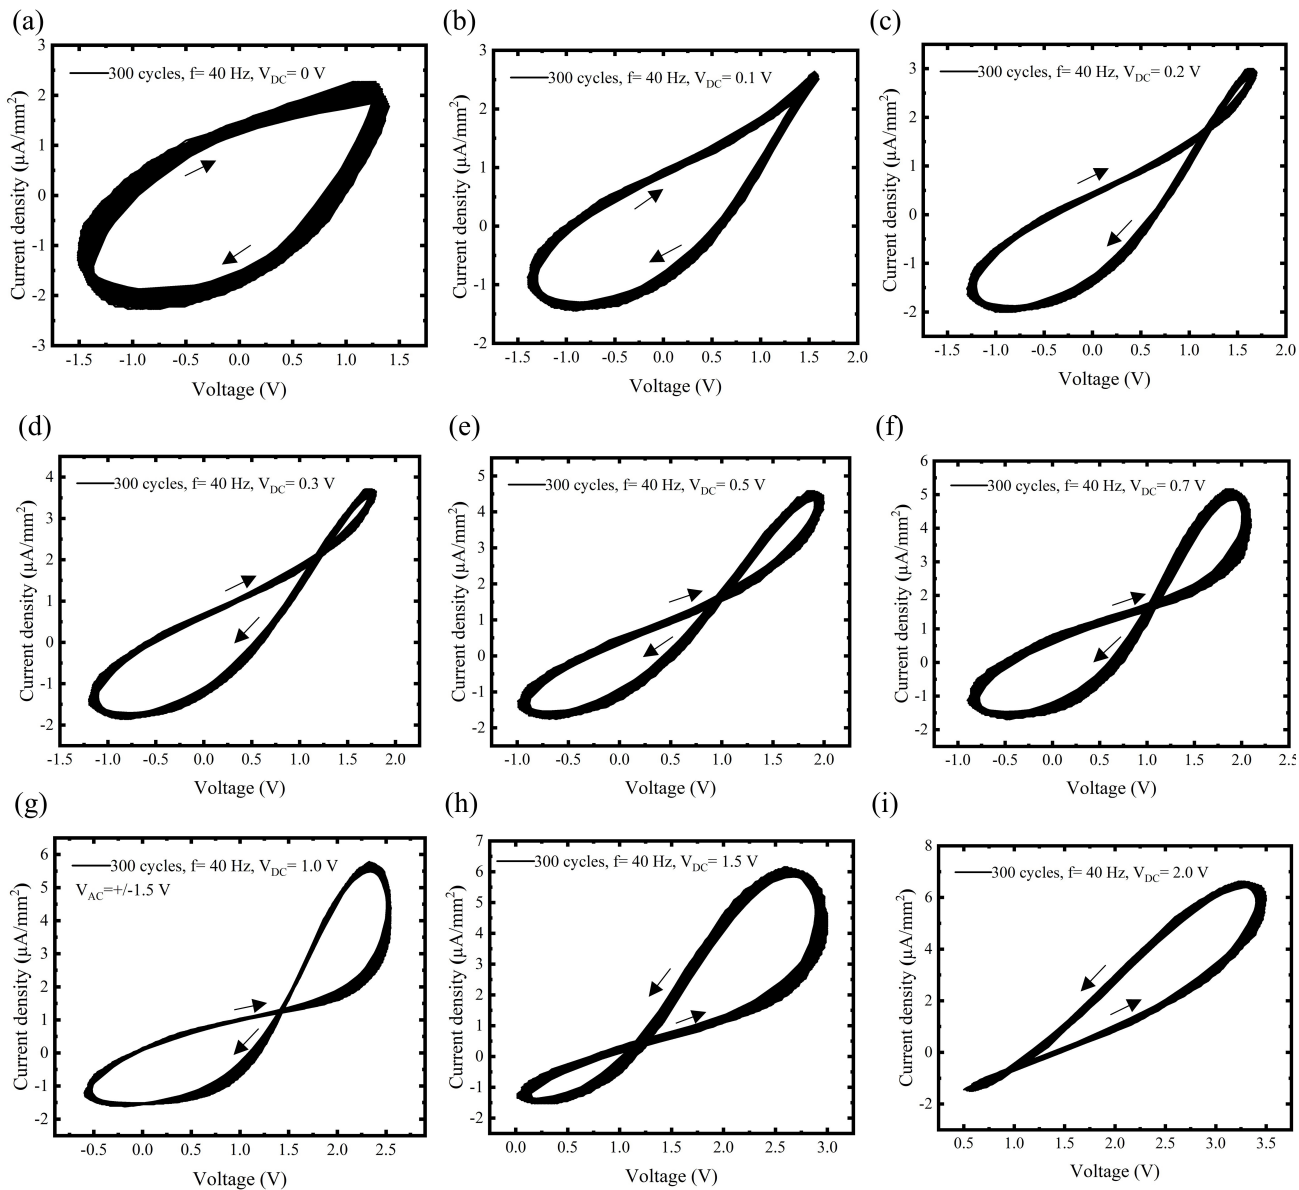

Supplement: d4nr03464c5.pdf [file d4nr03464c5.pdf]

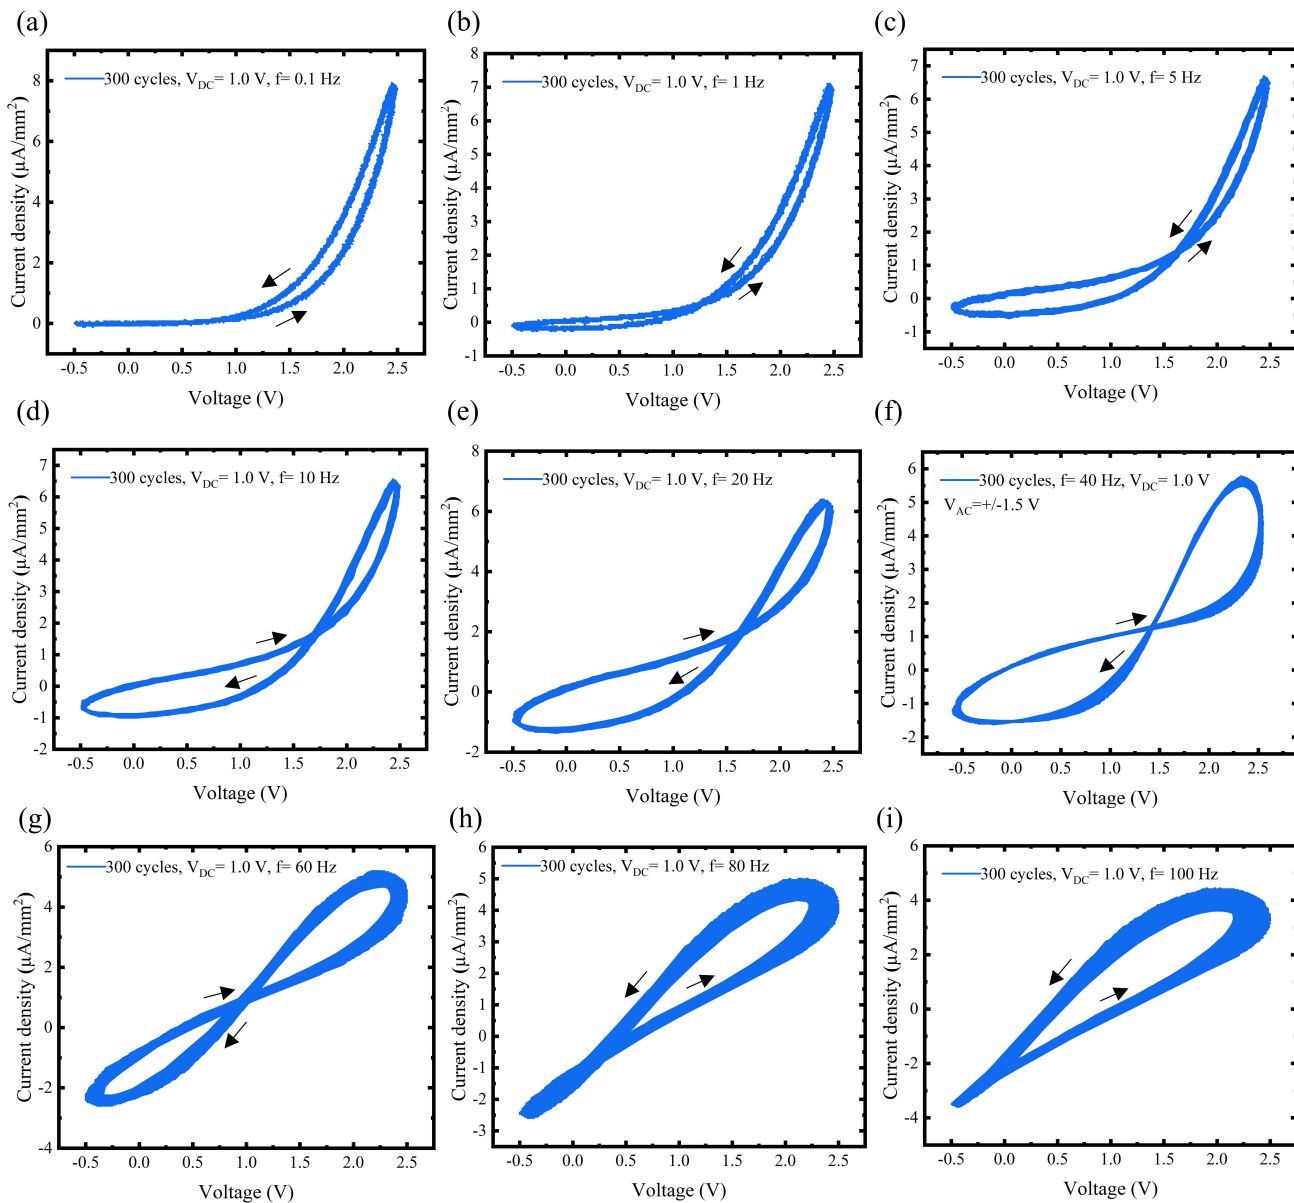

Supplement: d4nr03464c6.pdf [file d4nr03464c6.pdf]

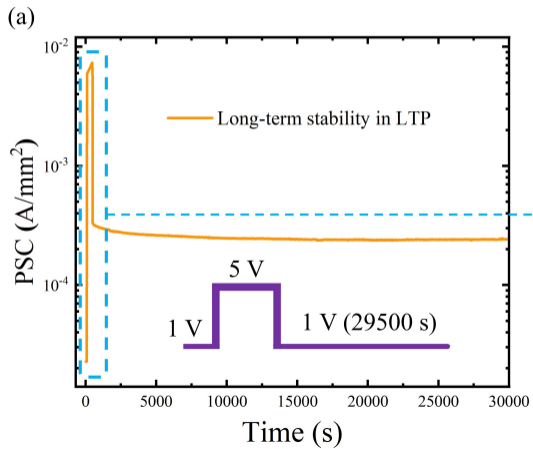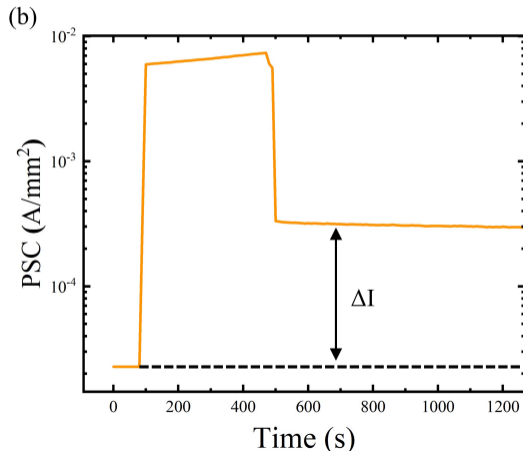

Supplement: d4nr03464c7.pdf [file d4nr03464c7.pdf]

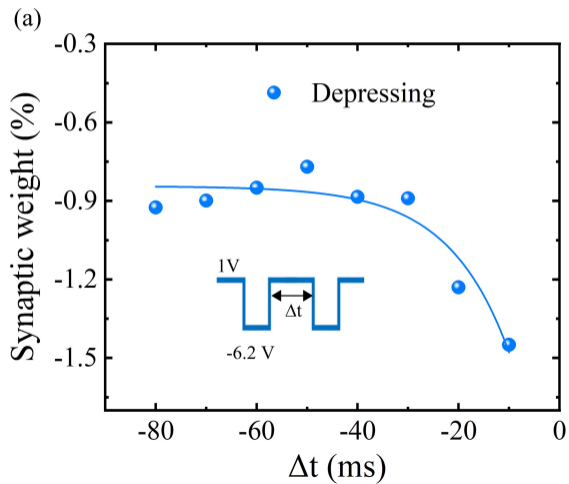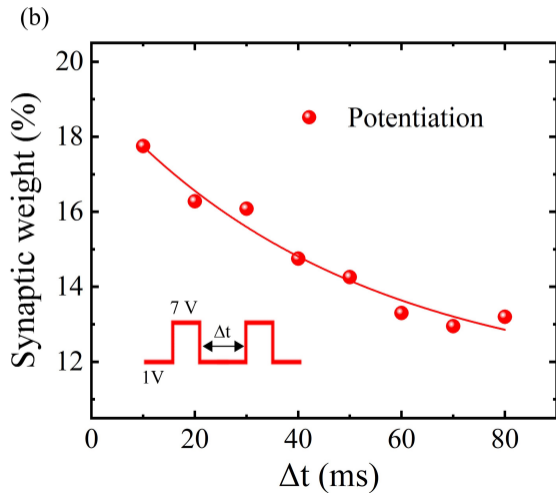

Supplement: d4nr03464c8.pdf [file d4nr03464c8.pdf]
